# Supplementary material for: Excellent adsorption–photocatalysis synergistic activity of 3D–3D flower-like BiOBr/graphene hydrogel composite and the removal of potassium butyl xanthate
Source: Royal Society of Chemistry journal article supplement (doi:10.1039/c9nj06060j), 2020-01-01
Supplement: c9nj06060j2.pdf [file c9nj06060j2.pdf]

## Excellent Adsorption-Photocatalysis Synergistic Activity of 3D-3D Flower-like

### BiOBr/Graphene Hydrogel Composite and the Removal of PBX

Liangliang Chang<sup>a,b</sup>, Yongping Pu<sup>a\*</sup>, Guodong Shen<sup>a</sup>, Yongfei Cui<sup>a</sup>, Xiaohong Wei<sup>a</sup>,  
Baoyue Cao<sup>b</sup>, Yan Yu<sup>b</sup>, Shan Xu<sup>b</sup>

Publication in Journal of New Journal of Chemistry

### Supporting information

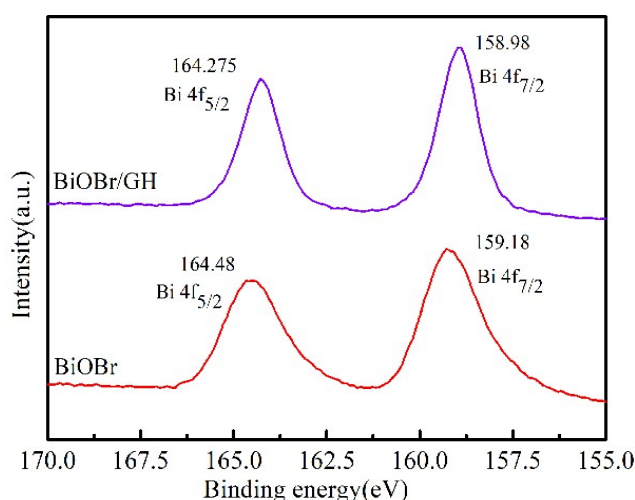

Fig. S1 XPS spectra of Bi 4f of BiOBr and 80%-GH/BiOBr composites

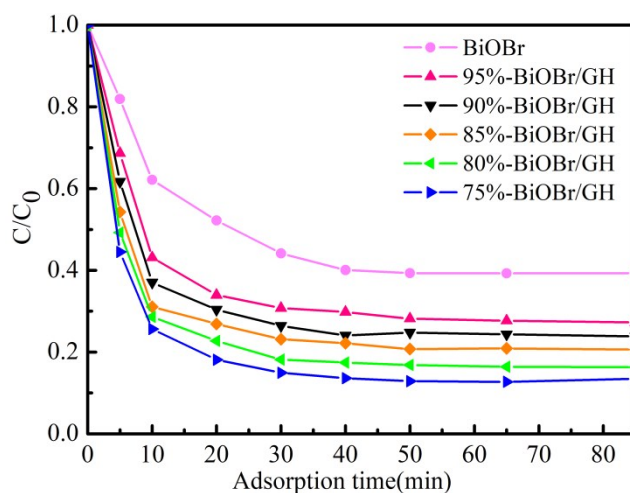

Fig. S2 Adsorption efficiency of PBX by BiOBr and composites (The dosage of all adsorbents was 25 mg, initial concentration of PBX was 40 mg/L, the reaction temperature was 298 K)

Table S1 Fitting adsorption kinetic models of PBX on 75%-BiOBr/GH

| $C_0$ (mg/L) | $q_{e(\text{exp})}$ (mg/g) | Pseudo-first-order model   |                            |         | Pseudo-second-order model  |                            |         |
|--------------|----------------------------|----------------------------|----------------------------|---------|----------------------------|----------------------------|---------|
|              |                            | $q_{e(\text{cal})}$ (mg/g) | $K_1$ (min <sup>-1</sup> ) | $R^2$   | $q_{e(\text{cal})}$ (mg/g) | $K_2$ (min <sup>-1</sup> ) | $R^2$   |
| 40mg/L       | 66.70                      | 51.73                      | 0.13                       | 0.97145 | 74.46                      | 0.0046                     | 0.99926 |

Table S2 Fitting results of Langmuir and Freundlich isotherm

| Langmuir isotherm       |                  |         | Freundlich isotherm                              |        |         |
|-------------------------|------------------|---------|--------------------------------------------------|--------|---------|
| $Q_{\max}(\text{mg/g})$ | $b(\text{L/mg})$ | $R^2$   | $K_F (\text{mg}^{1-1/n}\text{L}^{1/n}/\text{g})$ | $n$    | $R^2$   |
| 120                     | 0.2416           | 0.29204 | 11.53                                            | 1.5941 | 0.96378 |

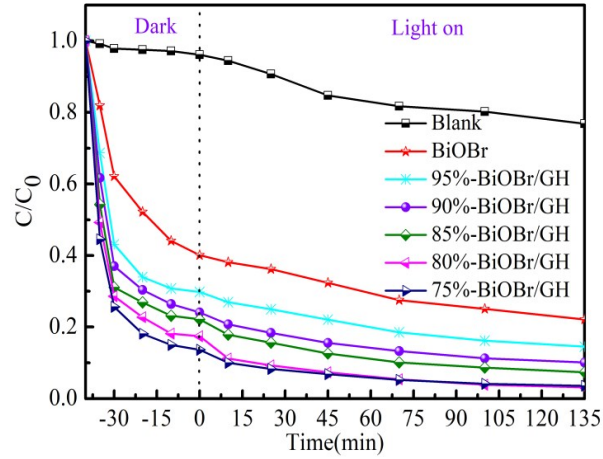

Fig. S3 Removal efficiency of PBX by dark reaction- photocatalysis

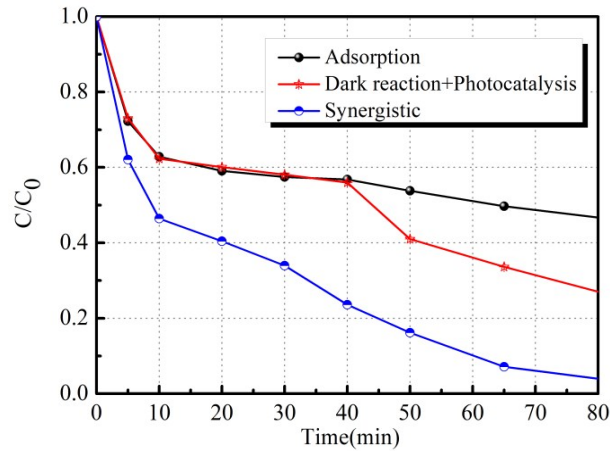

Fig. S4 Comparison of adsorption, photocatalysis, and synergistic efficiency of PBX by 75%-BiOBr /GH.  
(The dosage of 75%-BiOBr /GH was 25 mg, the initial concentration of PBX was 40 mg/L, the volume of PBX was 100 mL)

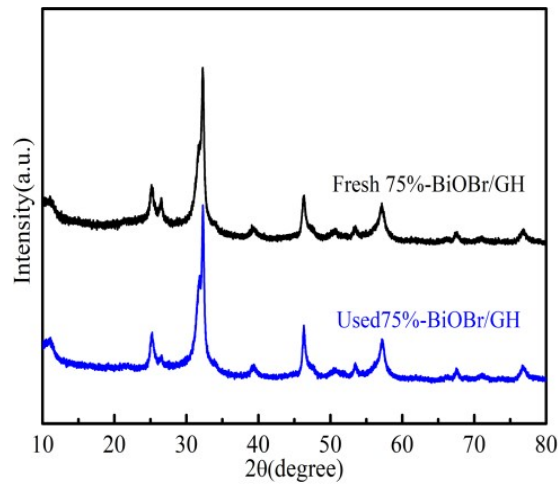

Fig. S5 XRD patterns of 75%-BiOBr/GH before and after 6th run cycle synergistic experiments

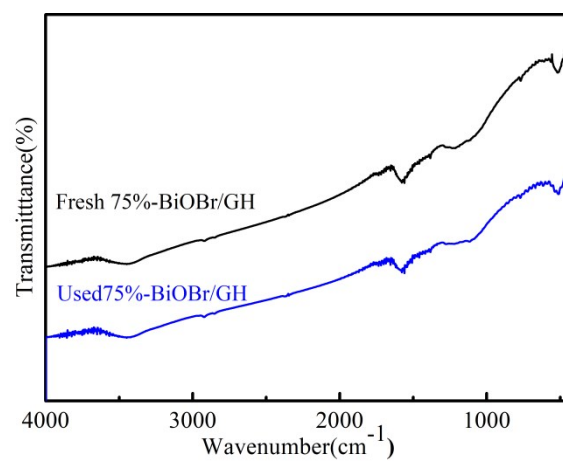

Fig.S6 FT-IR spectra of 75%-BiOBr/GH before use and after 6 recycled
